# Supplementary material for: Prohibitin-Mediated Lifespan and Mitochondrial Stress Implicate SGK-1, Insulin/IGF and mTORC2 in C. elegans
Source: PubMed Central journal article supplement (PMC4180437; doi:10.1371/journal.pone.0107671), 2014-09-29

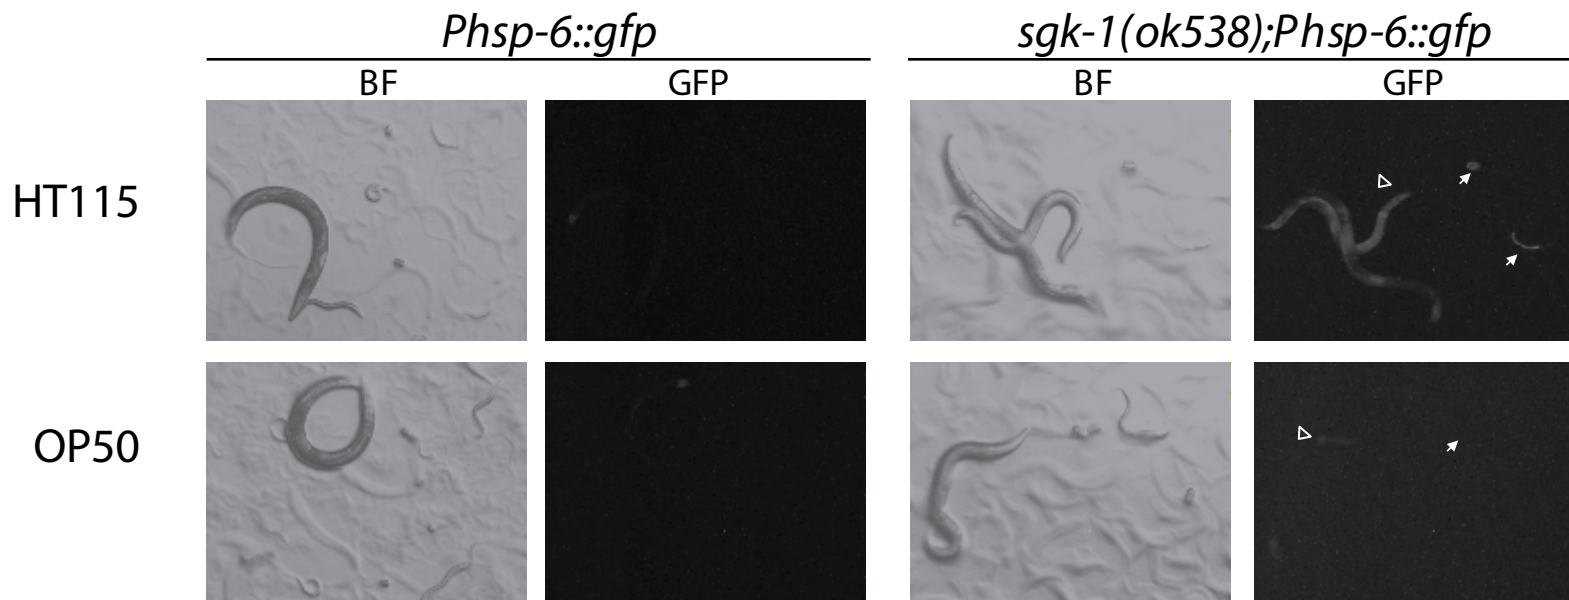

Supplement: pone.0107671.s005.pdf [file pone.0107671.s005.pdf]
